# Supplementary material for: Effects of Milling Methods and Cultivars on Physicochemical Properties of Whole-Wheat Flour
Source: Hindawi journal article supplement (doi:10.1155/2019/3416905), 2019-02-03
Supplement: f1 [file 3416905.f1.pdf]

**Supplementary Table 1. Results of two way (milling methods and cultivars) analysis of variance**

| Properties                     | Milling method | Cultivar | Milling method<br>*cultivar |
|--------------------------------|----------------|----------|-----------------------------|
| Moisture content               | ***            | ***      | ***                         |
| Protein                        | ***            | ***      | ***                         |
| Free lipid                     | ***            | ***      | ***                         |
| Bound lipid                    | ***            | ***      | ***                         |
| Total lipid                    | ***            | ***      | ***                         |
| Ash                            | ***            | ***      | ***                         |
| Total dietary fiber            | ***            | ***      | ***                         |
| Wet gluten                     | ***            | ***      | ***                         |
| Particle size                  | ***            | ***      | ***                         |
| Starch damage                  | NS             | ***      | ***                         |
| Falling number                 | ***            | ***      | ***                         |
| L                              | ***            | ***      | ***                         |
| a                              | ***            | ***      | ***                         |
| b                              | ***            | ***      | ***                         |
| Peak                           | ***            | ***      | ***                         |
| Trough                         | ***            | ***      | ***                         |
| Breakdown                      | ***            | ***      | ***                         |
| Fical viscosity                | ***            | ***      | ***                         |
| Setback                        | ***            | ***      | ***                         |
| <sup>1</sup> Wabs              | ***            | **       | ***                         |
| <sup>2</sup> DDT               | ***            | ***      | ***                         |
| <sup>3</sup> Stability         | ***            | ***      | ***                         |
| <sup>4</sup> C2                | ***            | NS       | ***                         |
| <sup>5</sup> C3                | **             | ***      | ***                         |
| <sup>6</sup> Cooking stability | NS             | ***      | ***                         |
| <sup>7</sup> Retrogradation    | NS             | ***      | ***                         |
| Resistance to extension        | NS             | ***      | ***                         |
| Extensibility                  | NS             | ***      | ***                         |
| WAI                            | ***            | ***      | ***                         |
| WSI                            | ***            | NS       | ***                         |

\*, \*\*, \*\*\* Significantly differ at  $p < 0.05$ ,  $< 0.01$ ,  $< 0.001$ , respectively. <sup>1</sup> Wabs means water absorption. <sup>2</sup>DDT means dough development time. <sup>3</sup>Stability is the remaining time after reached 1.1 torque. <sup>4</sup>C2 – protein weakening; <sup>5</sup>C3 – pasting properities; <sup>6</sup>C3-C4 – cooking stability; <sup>7</sup>C5-C4 – retrogradation properities. NS means not significantly differ.
